# Supplementary material
Source: PubMed Central journal article supplement (PMC6005702)
Supplement: NIHMS968843-supplement-Supplementary_Tables.pdf [file NIHMS968843-supplement-Supplementary_Tables.pdf]

## Supplementary Note 1

### ***DAPK1* reporter cell line generation**

#### Context-dependent assembly (CoDA) of Zinc Finger Nucleases:

ZiFiT software version (4.215)<sup>1</sup> was used to design Genome Editing Nucleases targeting GACAGCCACCAATCAGTTGATTGT on human chr9:90225669-90225692, downstream of *DAPK1* exon3 according to the CoDA method<sup>2</sup>. The underlined sequence indicates the 6nt spacer adjacent to the 2x9nt binding sequence. The predicted ZFN target sequence was checked by blast nucleotide search for lack of predicted additional targets.

#### ZFN-synthesis and reporter construct cloning:

Left and right ZFN-coding plasmid was synthesized by GeneArt® (Life technologies) into the standard cloning vector pANY (sequences are available upon request). Left and right ZFN-sequences were subcloned via BamHI + XhoI overhangs into the ZFN-expression vectors pAC.HA.nIL2RGL.hNeeai\_1140 and pAC.HA.nIL2RGR.hNqkiv\_1141, respectively, and sequence-verified by Sanger sequencing. pAC.HA.nIL2RGL.hNeeai\_1140 and pAC.HA.nIL2RGR.hNqkiv\_1141 were kindly provided by Prof. Cathomen (University Medical Centre, Freiburg). Standard molecular cloning techniques were used to create the reporter construct. The reporter was cloned into pBluescript II KS(-) as follows: First, PCR-amplification and subcloning of EGFP-Neo from LeGO-G/Neo-opt, mCherry-Zeo from LeGO-C/Zeo, SFFV-promoter from LeGO-C/Zeo (see Weber et al.<sup>3</sup> for vector details), BGH-polyA from pcDNA™5/FRT/TO (Invitrogen), SV40 polyA and CMV-TO from pT-Rex-DEST30 (Invitrogen), Spliceacceptor+self-cleaving peptide (SA-2A, synthesized as in AAVS1-SA-2A-puro-pA donor 19) and HSV-TK (from PL253 20) into pBluescript II KS(-). Next, the sequence-verified elements were excised from the plasmids, gel purified, and then step-wise ligated by T4-ligase to create the full reporter construct. After cloning, the 9.7 kb full-size dual-fluorescence/resistance reporter construct was partially re-sequenced at critical components to assure sequence correctness. Finally, left (chr9:90224925+90225674) and right (>chr9:90225687+90226448) homology arms of ~750 bp were PCR-amplified from NCI-H1299 genomic DNA and adjacently cloned into the donor plasmid. For details on restriction enzymes and primers used and further cloning details, see **Supplementary Table 6** and **Supplementary Fig. 2a and B**.

#### ZFN-mediated targeting of the endogenous *DAPK1* locus:

NCI-H1299 cells grown in RPMI 1640 supplemented with 10% FCS were seeded in T75 flasks at a density of 12000 cells/cm<sup>2</sup> and expanded for 24 h. Thereafter, transfection with 2 µg of left and right ZFN-encoding plasmid and 16 µg of donor plasmid using Trans-IT LT1 (Mirus Bio) was performed. Fresh media containing 100 µg/ml Zeocin (Invitrogen) was applied 48 h after transfection. After 10 d of Zeocin selection, integration positive polyclonal cell pools were subjected to monoclonal cell line generation by FACS-mediated single-cell cloning. For this purpose, mCherry-positive cells were sorted into 96 well plates by the DKFZ FACS core facility using the FACS Aria III machine (BD Biosciences). Two weeks after initial seeding and expansion under positive (100 µg/ml Zeocin) and negative (10µg/ml Ganciclovir, Sigma) selection pressure, surviving clones were further expanded. Correct reporter construct integration was validated by “In-Out” PCR and Southern-Blotting.

#### Genotyping polymerase chain reaction

Genomic DNA from polyclonal and monoclonal NCI-H1299 cell lines was isolated using the DNeasy Blood & Tissue Kit (Qiagen) according to the manufacturer’s protocol. Genotyping PCRs were performed with 50 ng template DNA in 96well format using Phusion High-Fidelity DNA-Polymerase (Thermo Scientific). One DAPK1-locus specific primer and one primer binding the reporter construct were applied for integration specific amplification. PCR-products of both 5` and 3` integration were visualized by Ethidium-Bromide stain on 1.5% Agarose gels to determine correct integration and sequence-verified in case of positively genotyped monoclonal cells. Primers used for cell line genotyping are listed in **Supplementary Table 7**.

#### Southern blotting

Genomic DNA (10 µg) was isolated by Phenol-chloroform extraction and separated on a 0.8% agarose gel after overnight digest with 100 U BamHI (NEB). Depurinated and denatured gel was then capillary transferred over-night to a nylon membrane (Amersham Hybond NX) and finally hybridized with <sup>32</sup>P-labeled (Megaprime DNA Labeling System, Amersham) probes against genomic DAPK1 loci upstream (chr9:90,224,318-90,224,820) or downstream (chr9:90,228,320-90,229,358) of the ZFN-mediated integration site. Probing was carried out in Church’s buffer (7% SDS, 1 mM EDTA, 0.5 M NaPi pH 7.2) supplemented with 100 µg/ml salmon sperm DNA (Invitrogen).

#### **Epigenetic compound viability screen**

Epigenetic compound screen in NCI-H1299 reporter cells was performed using the Epigenetics Screening Library (Cayman Chemical) in 96 well format with modifications. Compound concentrations were cross-referenced with commonly used cell-culture concentrations and adjusted to have maximum cytotoxic effects of 50 % viability reduction after 72 h of treatment. For details on

compounds and used concentrations, see **Supplementary Table 8**. Media containing the compound was refreshed every 24 h for 72h. G418-selection of DAPK1-reactivated cells was carried out in media containing 800 µg/ml G418 (Sigma) for 10 d and cell viability was quantified using the Calcein-AM assay. In brief, cells were grown in fresh media containing 0.8 µM Calcein-AM for 1 h and then lysed with PBS containing 3% Triton-X (Sigma) and fluorescent signal intensity was measured on a Spectramax M5e plate reader (at ex494 nm and em530 nm).

### **5' Rapid amplification of cDNA ends (5' RACE)**

5'RACE was essentially performed as described previously<sup>4</sup>. Firstly, cDNA was synthesized using 10 pmol gene-specific primer 1 (GSP1) and Thermoscript Reverse Transcriptase with 1 µg DNA-free template RNA for 50 min at 61 °C in 20 µl reaction volume. After heat inactivation at 80 °C for 5 min, RNA from cDNA-RNA hybrids was specifically digested by adding 1 µl of RNase H for 30 min at 37 °C. Next, RNase H was heat inactivated at 70 °C for 10 min. To purify the now single-stranded cDNA, DNA was precipitated by addition of 0.1 vol. 3 M sodium acetate, 2 µg Glycogen and 2.5 vol. 100% ethanol. After centrifugation at 13,000 g, the DNA pellet was washed in 500 µl 70% ethanol and then air dried before it was resuspended in 50 µl of H<sub>2</sub>O. To tail the 3' end of the newly synthesized cDNA, single-stranded cDNA was incubated with 30 U TdT and 100 pmol dATP at 37 °C for 15 min in a 20 µl reaction, followed by heat inactivation at 70 °C for 10 min and finally diluted by addition of 30 µl H<sub>2</sub>O. The first amplification PCR was carried out using the High Fidelity PCR system with 3 pmol primer Q<sub>T</sub>, 25 pmol primer Q<sub>0</sub> and 25 pmol primer GSP2 in a 50 µl reaction using 1.5 µl of tailed and diluted cDNA under the following cycling conditions: 2 min initial denaturation at 95 °C, 2 min annealing of primer Q<sub>T</sub>, 40 min of linear amplification with primer Q<sub>T</sub> at 68 °C. Next, linearly amplified and Q<sub>T</sub> tagged cDNA was then exponentially amplified by 10 touchdown cycles of 15 s at 94 °C, 30 s at 60 °C (-0.5 °C per cycle) and 1 min extension at 68 °C followed by 30 PCR-cycles at 55 °C annealing temperature and 1 min extension time. For the second PCR, 1.5 µl of 1:20 diluted PCR product from the first amplification was amplified employing 10 pmol Primer Q<sub>1</sub> and 10 pmol GSP3 primer with the same PCR protocol (touchdown 10+30 cycles) as for the first PCR, but lacking the initial steps of linear amplification. Finally, the PCR products were separated on a 1.5 % agarose gel and then gel-purified for subcloning, utilizing the TOPO TA Cloning Kit according to the manufacturer's protocol (Invitrogen). Cloned PCR-products from single blue-white selected colonies were Sanger-sequenced (GATC, Konstanz, Germany) to identify the cloned transcripts. For details on the used primers see **Supplementary Table 9**.

## Supplementary Tables

Supplementary Table 2: Filtering procedure of StringTie assembled transcripts

|                                                 | DAC | SB939 | DAC+SB |
|-------------------------------------------------|-----|-------|--------|
| <b>Total</b>                                    | 453 | 744   | 3627   |
| <b>Overlap protein-coding exon</b>              | 98  | 105   | 571    |
| <b>Longest isoform only</b>                     | 87  | 97    | 474    |
| <b>Highest coverage only</b>                    | 71  | 81    | 376    |
| <b>Translated (<i>in silico</i> prediction)</b> | 62  | 61    | 327    |

Supplementary Table 6: Oligonucleotides used for reporter construct and ZFN cloning

| Primer/Target | Forward (5' -> 3')                                | Reverse (5' -> 3')                                      | Details                                                                                                                                                                     |
|---------------|---------------------------------------------------|---------------------------------------------------------|-----------------------------------------------------------------------------------------------------------------------------------------------------------------------------|
| HA_3'4_Left   | CTAGCTAGGCGGCCG<br>CACTGCCACTGACCC<br>AAAAAG      | CTAGCTAGTCTAGA<br>GCTGTCCCTTCGGG<br>GTGG                | Cloning of the ~750 bp ZFN3'4 associated homology arm upstream (left) of the ZFN target site tagged with NotI (Forward, bold) and XbaI (Reverse, bold) recognition sites.   |
| HA_3'4right   | CTAGCTAGCTCGAGG<br>ATTGTTCTGTGTGTA<br>ATTTTGGAT   | CTAGCTAGGGTACC<br>TGAGCTATGATTGC<br>ACCACTG             | Cloning of the ~750 bp ZFN3'4 associated homology arm downstream (left) of the ZFN target site tagged with XhoI (Forward, bold) and KpnI (Reverse, bold) recognition sites. |
| SA-T2A        | CTAGCTAGTCTAGAC<br>TGACCTCTTCTTCC<br>TCCCAC       | CTAGCTAGGGATCC<br>CTCGAGCCTAGGGC<br>CGG                 | Cloning of the Spliceacceptor-T2A cassette from the synthesized ZFN vector tagged with XbaI (Forward, bold) and BamHI (Reverse, bold) recognition sites.                    |
| EGFP-NEO      | AAAGGATCCATCAGT<br>CAGCGTACGATGGTG<br>AGCAAGGGCGA | AAAGAATTCAGT<br>CTAGTCCGGATCAG<br>AAGAACTCGTCCAG<br>CAG | Cloning of the EGFP-NEO cassette from the LeGO-G/Neo-opt vector tagged with BamHI (Forward, bold) and EcoRI (Reverse, bold) recognition sites.                              |
| BGH-PolyA     | CTAGCTAGGAATTCC<br>CTCGACTGTGCCTTCT<br>AGTT       | CTAGCTAGAAGCTT<br>CCATAGAGCCCACC<br>GCAT                | Cloning of the BGH-pA cassette from the pcDNA™5/FRT/TO vector tagged with EcoRI (Forward, bold) and HindIII (Reverse, bold) recognition sites.                              |
| CMV-TO        | CTAGCTAGAAGCTTA<br>TGCATGTCGTTACAT                | CTAGCTAGATCGAT<br>TCCCGGTGTCTTCT                        | Cloning of the CMV-TO cassette from the pT-Rex-DEST30 vector tagged with HindIII                                                                                            |

|            |                                                     |                                                    |                                                                                                                                            |
|------------|-----------------------------------------------------|----------------------------------------------------|--------------------------------------------------------------------------------------------------------------------------------------------|
|            | AACTTACG                                            | ATGGAG                                             | (Forward, bold) and ClaI (Reverse, bold) recognition sites.                                                                                |
| Cherry-Zeo | AAAATCGATACTAGC<br>TAGACGCGTAATCCC<br>GCCACCATGGTGA | AAAGTCGACACTAG<br>CTAGCCCGGGTCAG<br>TCCTGCTCCTCGGC | Cloning of the Cherry-Zeo cassette from the LeGO-C/Zeo vector tagged with ClaI (Forward, bold) and Sall (Reverse, bold) recognition sites. |
| SV40-PolyA | CTAGCTAGGTCGACA<br>ACTTGTTTATTGCAGC<br>TTATAATGGT   | CTAGCTAGCTCGAG<br>GCCGATTCATTAAT<br>GCAGGA         | Cloning of the SV40-pA cassette from the pT-Rex-DEST30 vector tagged with Sall (Forward, bold) and XhoI (Reverse, bold) recognition sites. |
| SFFV       | CTAGCTAGGGTACCC<br>TGAAAGACCCACCT<br>GTAGG          | CTAGCTAGATCGAT<br>GGGCGACTCAGTCA<br>ATCG           | Cloning of the SFFV promoter from the LeGO-C/Zeo vector tagged with KpnI (Forward, bold) and ClaI (Reverse, bold) recognition sites.       |
| HSV-TK     | CTAGATCGATAATCC<br>CGCCACCATGGCTTC<br>GTACCCCGG     | CTAGACATGTTTCAG<br>TTAGCCTCCCCATC<br>T             | Cloning of the HSV-TK cassette from the PL253 vector tagged with ClaI (Forward, bold) and PciI (Reverse, bold) recognition sites.          |
| ZFN-left   | GAAAAAATCTAGAC<br>CCGGGG                            | CAGGAAACAGCTAT<br>GACCGG                           | Cloning of the ZFN “left” pairs from the synthesized ZFN plasmids into pAC.HA.nIL2RGL.hNeeai_1140.                                         |
| ZFN-right  | GAAAAAATCTAGAC<br>CCGGGG                            | GCAATGTAACATCA<br>GAGATGGATC                       | Cloning of the ZFN “right” pairs from the synthesized ZFN plasmids and pAC.HA.nIL2RGR.hNqkiv_1141.                                         |

**Supplementary Table 7: Genotyping primers**

| Primer/Target              | Forward (5' -> 3')         | Reverse (5' -> 3')           | Details                                                                                                    |
|----------------------------|----------------------------|------------------------------|------------------------------------------------------------------------------------------------------------|
| ZFN3'4<br>genotyping_Left  | GAACTTCCTCTGAGG<br>GTTAGTG | GTGGGAGGAAGAGA<br>AGAGGTCA   | Forward primer binds genomic sequence upstream of ZFN3'4 target site. Reverse primer binds SA-2A sequence. |
| ZFN3'4<br>genotyping_Right | GACTTCGTGGAGGAC<br>GACTT   | AAAAAGGAAAAATTG<br>AAATTCTGG | Reverse primer binds genomic sequence downstream of ZFN3'4 target site. Forward primer binds Zeo cassette. |

**Supplementary Table 8: Epigenetic compound library**

| <b>Compound</b>                      | <b>Target group</b> | <b>Primary target proteins</b> | <b>IC50 in NCI-H1299 H2 cells</b> | <b>Concentration used [nM]</b> |
|--------------------------------------|---------------------|--------------------------------|-----------------------------------|--------------------------------|
| Zebularine                           | DNMT                | DNMT1                          | >50µM                             | 50000                          |
| RG-108                               | DNMT                | DNMT1                          | >50µM                             | 50000                          |
| 2',3',5'-triacetyl-5-Azacytidine     | DNMT                | DNMT1                          | >50µM                             | 50000                          |
| Decitabine                           | DNMT                | DNMT1                          | >50µM                             | 1000                           |
| 5-Azacytidine                        | DNMT                | DNMT1                          | 7.5µM                             | 5000                           |
| Delphinidin chloride                 | HATS                | HATs,                          | 25µM                              | 50000                          |
| Anacardic Acid                       | HATS                | HATs,p300;PCAF                 | >50µM                             | 50000                          |
| Garcinol                             | HATS                | HATs,p300;PCAF                 | 6µM                               | 5000                           |
| SB939                                | HDAC                | HDAC pan                       | 700nM                             | 500                            |
| CAY10398                             | HDAC                | HDAC1                          | 7.5µM                             | 5000                           |
| MS-275                               | HDAC                | HDAC1                          | 120nM                             | 100                            |
| Suberohydroxamic Acid                | HDAC                | HDAC1 , HDAC3                  | 20µM                              | 10000                          |
| CBHA                                 | HDAC                | HDAC1, 3                       | 4000nM                            | 1000                           |
| M 344                                | HDAC                | HDAC1, 3,6                     | 1µM                               | 500                            |
| Tubastatin A (trifluoroacetate salt) | HDAC                | HDAC6                          | 15µM                              | 1000                           |
| CAY10603                             | HDAC                | HDAC6                          | 1µM                               | 500                            |
| Valproic Acid (sodium salt)          | HDAC                | HDACs pan                      | >50µM                             | 50000                          |
| Chidamide                            | HDAC                | HDACs pan                      | 5µM                               | 5000                           |
| HNHA                                 | HDAC                | HDACs pan                      | >50µM                             | 5000                           |
| (S)-HDAC-42                          | HDAC                | HDACS pan                      | 0.5µM                             | 500                            |
| VPA                                  | HDAC                | HDACS pan                      | 1600µM                            | 50000                          |
| HC Toxin                             | HDAC                | HDACs 1,2,3,8                  | 40nM                              | 50                             |
| Scriptaid                            | HDAC                | HDACs 1,2,8                    | 1µM                               | 1000                           |
| Oxamflatin                           | HDAC                | HDACs 3,6                      | 100nM                             | 50                             |
| Pimelic Diphenylamide 106            | HDAC                | HDACs Class I                  | 16µM                              | 10000                          |
| Sodium Butyrate                      | HDAC                | HDACS Class I, lia             | >50µM                             | 50000                          |
| Apicidin                             | HDAC                | HDACs Class I,II               | 200nM                             | 100                            |
| Trichostatin A                       | HDAC                | HDACs Class I,II               | 50nM                              | 50                             |

|                                  |       |                          |          |          |
|----------------------------------|-------|--------------------------|----------|----------|
| SAHA                             | HDAC  | HDACs Class I+II, IV     | 3-4µM    | 1000     |
| 4-iodo-SAHA                      | HDAC  | HDACs Class I+II, IV     | 0.6µM    | 500      |
| Chaetocin                        | HMTS  | SU(VAR)3-9; G9a/GLP      | < 20nm   | 5000     |
| 3-Deazaneplanocin A              | HMTS  | EZH2, other HMTs         | >50µM    | 10000    |
| BIX01294 (hydrochloride hydrate) | HMTS  | G9a                      | 10µM     | 5000     |
| UNC0321 (trifluoroacetate salt)  | HMTS  | G9a, GLP                 | >50µM    | 1000     |
| UNC0638                          | HMTS  | G9A, GLP                 | 15µM     | 1000     |
| UNC0224                          | HMTS  | G9a, GLP                 | 20µM     | 1000     |
| 2-PCPA (hydrochloride)           | HDM   | LSD1, MAOA, MAOB         | >50µM    | 50000    |
| Genistein                        | OTHER | various                  | 7.5µM    | 5000     |
| Nicotinamide                     | OTHER | various                  | >50µM    | 50000    |
| Suramin (sodium salt)            | OTHER | various                  | >50µM    | 50000    |
| EGCG                             | OTHER | various                  | 50µM     | 50000    |
| IOX1                             | OTHER | 2OG                      | 10µM     | 10000    |
| Gemcitabine                      | OTHER | Gadd45a                  | 70nM     | 50       |
| 2,4-DPD                          | OTHER | HIF-PH                   | >50µM    | 5000     |
| SP600125                         | OTHER | JNK                      | >5µM     | 5000     |
| Phthalazinone pyrazole           | OTHER | Aurora-A-Kinase          | >50µM    | 1000     |
| (+)-JQ1                          | OTHER | BETs, BRD4               | 500nM    | 1000     |
| (-)-JQ1                          | OTHER | None, inactive           | 25µM     | 1000     |
| Flavopiridol                     | OTHER | CDKs                     | 70nM     | 50       |
| Tunicamycin                      | OTHER | Cell cycle               | 200ng/ml | 100ng/ml |
| trans-Resveratrol                | OTHER | COX, Sirts               | 25µM     | 10000    |
| Ellagic Acid                     | OTHER | CytP450                  | 10µM     | 10000    |
| Fludarabine                      | OTHER | DNA-Synthesis inhibition | 30nM     | 50       |
| DMOG                             | OTHER | HIF-PH                   | >50µM    | 50000    |

|                                     |          |                     |        |        |
|-------------------------------------|----------|---------------------|--------|--------|
| PD03259                             | OTHER    | MAPK                | 4.1nM  | 1      |
| Mirin                               | OTHER    | MRN; ATM            | 50µM   | 50000  |
| SB202190                            | OTHER    | p38a , p38b         | >5µM   | 5000   |
| F-Amidine (trifluoroacetate salt)   | OTHER    | PAD4                | >50µM  | 50000  |
| Cl-Amidine                          | OTHER    | PAD4                | >50µM  | 50000  |
| Phorbol-12-myristat-13-acetat (TPA) | OTHER    | PKC activation      | 2µg/ml | 1ng/ml |
| Isoliquiritigenin                   | OTHER    | Quinone reductase-1 | 7.5µM  | 5000   |
| ATRA                                | OTHER    | RAR                 | 25µM   | 10000  |
| CCG-100602                          | OTHER    | Rho signaling       | 4.5µM  | 5000   |
| Anisomycin                          | OTHER    | Ribosome            | 100nM  | 100    |
| Etoposide                           | OTHER    | Topoisomerase       | 800nM  | 1000   |
| Curcumin                            | OTHER    | various             | 3µM    | 1000   |
| Xanthohumol                         | OTHER    | various             | 6µM    | 3000   |
| BSI-201                             | PARP     | PARP-1              | >50µM  | 50000  |
| AG-014699                           | PARP     | PARP-1              | 10µM   | 1000   |
| 3-amino Benzamide                   | PARP     | PARP-1              | >50µM  | 50000  |
| (-)-Neplanocin A                    | SAH      | SAH                 | 600 nM | 500    |
| S-Adenosylhomocysteine              | SAH      | SAH                 | >50µM  | 50000  |
| Splitomicin                         | SIRTUINS | Sir2p               | >50µM  | 50000  |
| EX-527                              | SIRTUINS | Sirt1               | >50µM  | 50000  |
| Sirtinol                            | SIRTUINS | SIRT1; SIRT2        | 10µM   | 5000   |
| AGK2                                | SIRTUINS | SIRT2               | >50µM  | 50000  |
| JGB1741                             | SIRTUINS | SIRTs               | 50µM   | 50000  |
| Salermide                           | SIRTUINS | SIRTs               | 5µM    | 5000   |
| Tenovin-6                           | SIRTUINS | SIRTs               | 3µM    | 1000   |
| Tenovin-1                           | SIRTUINS | Sirts               | 1.5µM  | 1000   |

Information on inhibited proteins for the individual compounds was derived from <http://www.caymanchem.com>

**Supplementary Table 9: 5'RACE primers**

| Primer/Target  | Forward (5' -> 3')             | Details                  |
|----------------|--------------------------------|--------------------------|
| Q <sub>T</sub> | CCAGTGAGCAGAGTGACGAGGACTCGAGCT | 5' RACE standard primer. |



|                |                         |                          |
|----------------|-------------------------|--------------------------|
|                | CAAGCTTTTTTTTTTTTTTTTTT |                          |
| Q <sub>0</sub> | CCAGTGAGCAGAGTGACG      | 5' RACE standard primer. |
| Q <sub>1</sub> | GAGGACTCGAGCTCAAGC      | 5' RACE standard primer. |
| GSP1           | GGTCAGGGTGGTCACGAG      | Binds EGFP.              |
| GSP2           | GCCCTTGCTCACCATCGTA     | Binds SA-2A sequence.    |
| GSP3           | CACGTCACCGCATGTTAGA     | Binds SA-2A sequence.    |

**Supplementary Table 10: Oligonucleotides used for shRNA cloning into pRS19**

| Primer/Target | Forward (5' -> 3')                                                     | Reverse (5' -> 3')                                                    |
|---------------|------------------------------------------------------------------------|-----------------------------------------------------------------------|
| shDNMT1-3     | accgggccaatgagattgacattaagtaata<br>ttcatagcttgatgtcagctcattgggctttt    | cgaaaaagccaatgagactgacatcaagctatgaatattaa<br>cttaatgtcaatctcattgggcc  |
| shLuc2        | accggcttcgaaatgttcgtttggttgtaaatatt<br>catagcaaccgaacggacatttcgaagtttt | cgaaaaacttcgaaatgtccgttcggttgctatgaatattaac<br>aaccaaacgaacatttcgaagc |

**Supplementary Table 11: Primer sequences**

| Sequence 5' -> 3'                     | Target    | Target                 | Orientati<br>on | Application |
|---------------------------------------|-----------|------------------------|-----------------|-------------|
| GCAGGAAAACGTGGATGATT                  | DAPK1     | Exon 2                 | Forward         | qRT-PCR     |
| CATTTCTCACAACCGCAA                    | DAPK1     | Exon 3                 | Reverse         | qRT-PCR     |
| TGCAAGAAATACGAAGCCAGA                 | DAPK1     | 3' UTR                 | Forward         | qRT-PCR     |
| GGTTGGTCCATTGAGCTT                    | DAPK1     | 3' UTR                 | Reverse         | qRT-PCR     |
| ACGGACGTCATCCTGATCTT                  | DAPK1     | Exon 3                 | Forward         | qRT-PCR     |
| CACGTCACCGCATGTTAGA                   | DAPK1     | EGFP construct         | Reverse         | qRT-PCR     |
| GGACTGTGAGTTTTCTGAGGGTA               | DAPK1     | $\alpha$ -transcript   | Forward         | qRT-PCR     |
| CATTTCTCACAACCGCAA                    | DAPK1     | $\alpha$ -transcript   | Reverse         | qRT-PCR     |
| GGAAATTGGAGCTTCCAAAAG                 | DAPK1     | $\beta$ -transcript    | Forward         | qRT-PCR     |
| CATTTCTCACAACCGCAA                    | DAPK1     | $\beta$ -transcript    | Reverse         | qRT-PCR     |
| TACCTTGAGACGGGAGGAGA                  | DAPK1     | $\gamma$ -transcript   | Forward         | qRT-PCR     |
| CATTTCTCACAACCGCAA                    | DAPK1     | $\gamma$ -transcript   | Reverse         | qRT-PCR     |
| aggaagagagAGTTTAGTAATGTGTTAT<br>AGGTG | DAPK1     | Promoter CpG<br>island | Forward         | MassARRAY   |
| cagtaatacgactcactataggagaaggctA       | DAPK1 CGI | Promoter CpG           | Reverse         | MassARRAY   |

|                         |            |             |         |         |
|-------------------------|------------|-------------|---------|---------|
| CCAATAAAAACCTACAAAC     |            | island      |         |         |
| AGCCACATCGCTCAGACAC     | GAPDH      | Housekeeper | Forward | qRT-PCR |
| GCCCAATACGACCAAATCC     | GAPDH      | Housekeeper | Reverse | qRT-PCR |
| TGACCTTGATTTATTTGCATACC | HPRT1      | Housekeeper | Forward | qRT-PCR |
| CGAGCAAGACGTTCAATCCT    | HPRT1      | Housekeeper | Reverse | qRT-PCR |
| CAACGAGTCTGGCTTTGAGA    | DNMT1      | Housekeeper | Forward | qRT-PCR |
| GACACAGGTGACCGTGCTTA    | DNMT1      | Housekeeper | Reverse | qRT-PCR |
| ATTGGCAATGAGCGGTTCC     | beta-Actin | Housekeeper | Forward | qRT-PCR |
| GGATGCCACAGGACTCCAT     | beta-Actin | Housekeeper | Reverse | qRT-PCR |
| ATGGGCCGCCTTAAGAGTAA    | NAALAD2    | TINAT       | Forward | qRT-PCR |
| GCAATGCTTCTCTCCTGGA     | NAALAD2    | Exon        | Reverse | qRT-PCR |
| TGATTTTCTCTTGCTGCCGC    | ERC1       | TINAT       | Forward | qRT-PCR |
| CGCAATTCATCCTGGAGAGC    | ERC1       | Exon        | Reverse | qRT-PCR |
| AGCTCTCATCTGGTCTGCTG    | CRADD      | TINAT       | Forward | qRT-PCR |
| CTGGTTAATCTGCCGGTCTG    | CRADD      | Exon        | Reverse | qRT-PCR |
| AACGCATCGGAAGCAAGA      | FMN1       | TINAT       | Forward | qRT-PCR |
| CTCTGTTGGAAGGTCTTTAGG   | FMN1       | Exon        | Reverse | qRT-PCR |
| GAACAACCTCCAGACGCG      | DNAH3      | TINAT       | Forward | qRT-PCR |
| TGGAAATGATATTCAGATGGCGA | DNAH3      | Exon        | Reverse | qRT-PCR |
| CTCCAACACATCCGACCAT     | DNAH12     | TINAT       | Forward | qRT-PCR |
| TTTTCTGTGCCTGCTGG       | DNAH12     | Exon        | Reverse | qRT-PCR |
| TCCTCATTTTCTTTGTACCAC   | FARS2      | TINAT       | Forward | qRT-PCR |
| TGCGTAATTCTCAGAGGGCA    | FARS2      | Exon        | Reverse | qRT-PCR |
| TCACTGTGAGGGTCCGCG      | CPED1      | TINAT       | Forward | qRT-PCR |
| GTGGCTGCTGTATTTCTGGT    | CPED1      | Exon        | Reverse | qRT-PCR |
| ACGCGCTGCCTTTTAGAAC     | COL28A1    | TINAT       | Forward | qRT-PCR |
| AATCCTTCTCCGGGTAAGCC    | COL28A1    | Exon        | Reverse | qRT-PCR |
| ACTGTCCTACGGGCTAGAGA    | FBP2       | TINAT       | Forward | qRT-PCR |
| ACCATGTTGATCACCAGGGA    | FBP2       | Exon        | Reverse | qRT-PCR |
| TTCTTCTGGTGTCTGTGGA     | BCAS1      | TINAT       | Forward | qRT-PCR |
| TGGTAAGTCTCTGCTTCTGGT   | BCAS1      | Exon        | Reverse | qRT-PCR |
| GCTCCATTCATGATCACCTTCT  | CRYGC      | TINAT       | Forward | qRT-PCR |
| TTGGTAGTTGGGACGCTCAT    | CRYGC      | Exon        | Reverse | qRT-PCR |
| GCTCCATTCATGATCACCTTCT  | ATP6V1H    | TINAT       | Forward | qRT-PCR |

|                         |         |       |         |         |
|-------------------------|---------|-------|---------|---------|
| TTGGTAGTTGGGACGCTCAT    | ATP6V1H | Exon  | Reverse | qRT-PCR |
| GGGTGTGTTTTCTTCCCCTT    | PON2    | TINAT | Forward | qRT-PCR |
| ATTCCCGTGCCCTTGGTTTT    | PON2    | Exon  | Reverse | qRT-PCR |
| GGTCAGCAAATGCATGGAG     | AVEN    | TINAT | Forward | qRT-PCR |
| TCTGCATCGCTGTCATCTC     | AVEN    | Exon  | Reverse | qRT-PCR |
| ACCAATTCTGGACACACTGG    | CACUL1  | TINAT | Forward | qRT-PCR |
| TGATCTATGGCACCATCCAA    | CACUL1  | Exon  | Reverse | qRT-PCR |
| TGGGAGATGGAGATCTCTGG    | CERCAM  | TINAT | Forward | qRT-PCR |
| CTGATGGCACTGCTGTTGAG    | CERCAM  | Exon  | Reverse | qRT-PCR |
| CATGGTTTTTGGCTTCACCT    | CFLAR   | TINAT | Forward | qRT-PCR |
| GCAAATTGGCCAAGAATCTG    | CFLAR   | Exon  | Reverse | qRT-PCR |
| CGGATGAAGGACCAGTGTG     | CLU     | TINAT | Forward | qRT-PCR |
| TTCCTGGTCAACCTCTCAGC    | CLU     | Exon  | Reverse | qRT-PCR |
| CATGGCTCCCCTCATCCT      | CPSF1   | TINAT | Forward | qRT-PCR |
| AAAGCGGACTTTGAGATTGC    | CPSF1   | Exon  | Reverse | qRT-PCR |
| CCCAACACATCCGACCAT      | DNAH12  | TINAT | Forward | qRT-PCR |
| TAGCCAAGTCCTTGGTGGTT    | DNAH12  | Exon  | Reverse | qRT-PCR |
| GGAAGATGCACTGACTAGAACTG | DNAJC1  | TINAT | Forward | qRT-PCR |
| CAGGAAATTCAGTTTTTGGTTT  | DNAJC1  | Exon  | Reverse | qRT-PCR |
| TATTCATCCATGGGCCAGAT    | FANCC   | TINAT | Forward | qRT-PCR |
| CCCAAGACCTTGAGTGAAAAG   | FANCC   | Exon  | Reverse | qRT-PCR |
| GCATGGAGTACCTGGAGAGC    | FES     | TINAT | Forward | qRT-PCR |
| GGGACATCCCAAAGTCACTG    | FES     | Exon  | Reverse | qRT-PCR |
| TCCGGACACAATGGTACAAA    | FMN1    | TINAT | Forward | qRT-PCR |
| TTCTTTGTGCTCCCTCTTCAA   | FMN1    | Exon  | Reverse | qRT-PCR |
| GAATTCATTGCTTGGCTGGT    | GCG     | TINAT | Forward | qRT-PCR |
| CGGCCAAGTTCTTCAACAAT    | GCG     | Exon  | Reverse | qRT-PCR |
| ATGCACGACTTGAAGACACG    | IGF2R   | TINAT | Forward | qRT-PCR |
| CAATGCTGCTCTGGACTCTG    | IGF2R   | Exon  | Reverse | qRT-PCR |
| TTGCTCCTCATTGCCTTCT     | INTS7   | TINAT | Forward | qRT-PCR |

|                        |         |       |         |         |
|------------------------|---------|-------|---------|---------|
| AAAGTCTGGGAAAGCGAACA   | INTS7   | Exon  | Reverse | qRT-PCR |
| GGAGCAAACCTCCAGACACG   | JHDM1D  | TINAT | Forward | qRT-PCR |
| CAGCATGATGTTCTTCTACTCC | JHDM1D  | Exon  | Reverse | qRT-PCR |
| ATGTGCTCCTGCAGAAAAGG   | MYO5C   | TINAT | Forward | qRT-PCR |
| GAGAGAGGGGCTCCAAAGTT   | MYO5C   | Exon  | Reverse | qRT-PCR |
| TCTGCCACCATGTGAAATGT   | OSMR    | TINAT | Forward | qRT-PCR |
| GGTAAGTCCTCAAGGACAGCA  | OSMR    | Exon  | Reverse | qRT-PCR |
| GGAACCCTGACCTGTACGAT   | PIH1D1  | TINAT | Forward | qRT-PCR |
| ATGTTCTGCTGCGAGATGG    | PIH1D1  | Exon  | Reverse | qRT-PCR |
| GTGAAGCGGTTGAGTTCCTT   | PRKCG   | TINAT | Forward | qRT-PCR |
| AACTTGCCCAGCTGTTGAAT   | PRKCG   | Exon  | Reverse | qRT-PCR |
| CAGCAGGAGGGGAACCTACCT  | RBCK1   | TINAT | Forward | qRT-PCR |
| AAGGTGTGCAGACACTCACG   | RBCK1   | Exon  | Reverse | qRT-PCR |
| TCTCTCTGGCCAAGACCACT   | SFN     | TINAT | Forward | qRT-PCR |
| TGATGAGGGTGCTGTCTTTG   | SFN     | Exon  | Reverse | qRT-PCR |
| AACCACCACCAAAAACCTCA   | SRSF6   | TINAT | Forward | qRT-PCR |
| CGAACAGGTGGTCCGTATTT   | SRSF6   | Exon  | Reverse | qRT-PCR |
| AGAAGGACGTGTTTGCTTCC   | STPG1   | TINAT | Forward | qRT-PCR |
| GCCAGTGCGTTCATTTTTCT   | STPG1   | Exon  | Reverse | qRT-PCR |
| TTGCCTGGGAGGTACAGTTC   | TFCP2L1 | TINAT | Forward | qRT-PCR |
| GCGAGCACATCACTGAGCTA   | TFCP2L1 | Exon  | Reverse | qRT-PCR |
| TTCCGGACACCCTATCAGAG   | TP63    | TINAT | Forward | qRT-PCR |
| ATGAGCTGGGGTTTCTACGA   | TP63    | Exon  | Reverse | qRT-PCR |
| CAGAAAGGGAATCTTCAGTCG  | ZNF236  | TINAT | Forward | qRT-PCR |
| ACCCATATGCATCTTGCTGA   | ZNF236  | Exon  | Reverse | qRT-PCR |
| TCATGCAGAACTTGCTCGAC   | ZNF546  | TINAT | Forward | qRT-PCR |
| TTCCGTTTGAAGACGAAAGG   | ZNF546  | Exon  | Reverse | qRT-PCR |

|                          |                    |             |         |                        |
|--------------------------|--------------------|-------------|---------|------------------------|
| GCCAGTGACAATGCCTTCAT     | ZNF582             | TINAT       | Forward | qRT-PCR                |
| TGGGTCAGCTTCTCTGAGGT     | ZNF582             | Exon        | Reverse | qRT-PCR                |
| TCACTCTTTGGGTCCACACT     | LTR12C_1           | Consensus   | Forward | qRT-PCR                |
| TGGAGTTGTTTCGTTCTCCC     | LTR12C_1           | Consensus   | Reverse | qRT-PCR                |
| GAAGGCTCATGGCAAGAAGG     | Rabbit beta-Globin | Housekeeper | Forward | qRT-PCR                |
| ATGATGAGACAGCACAATAACCAG | Rabbit beta-Globin | Housekeeper | Reverse | qRT-PCR                |
| CTGAACTCGCATCATCCGTG     | CRYGC              | 5'UTR       | Forward | In vitro transcription |
| CTCACTGACTCACCCAGAGC     | CRYGC              | TINAT       | Forward | In vitro transcription |
| TGGGAAATTGGTAGTGTTAAGCT  | CRYGC              | 3'UTR       | Reverse | In vitro transcription |
| CCGTTTGGGTCTCTTTCC       | FBP2               | TINAT       | Forward | In vitro transcription |
| GCTTCCAAACCTGTCGTAAG     | FBP2               | 3'UTR       | Reverse | In vitro transcription |
| TCATTCTTCTGGTGTCTGTGG    | BCAS1              | TINAT       | Forward | In vitro transcription |
| TTCCCTCCCTTCCTGCTTG      | BCAS1              | 3'UTR       | Reverse | In vitro transcription |

#### References

- 1 Sander, J. D. *et al.* ZiFiT (Zinc Finger Targeter): an updated zinc finger engineering tool. *Nucleic acids research* **38**, W462-468, doi:10.1093/nar/gkq319 (2010).
- 2 Segal, D. J. Zinc-finger nucleases transition to the CoDA. *Nature methods* **8**, 53-55, doi:10.1038/nmeth0111-53 (2011).
- 3 Weber, K., Mock, U., Petrowitz, B., Bartsch, U. & Fehse, B. Lentiviral gene ontology (LeGO) vectors equipped with novel drug-selectable fluorescent proteins: new building blocks for cell marking and multi-gene analysis. *Gene therapy* **17**, 511-520, doi:10.1038/gt.2009.149 (2010).
- 4 Frohman, M. A. Rapid amplification of complementary DNA ends for generation of full-length complementary DNAs: thermal RACE. *Methods in enzymology* **218**, 340-356 (1993).
